# Supplementary material for: N-protein presents early in blood, dried blood and saliva during asymptomatic and symptomatic SARS-CoV-2 infection
Source: PubMed Central journal article supplement (PMC7997897; doi:10.1038/s41467-021-22072-9), 2021-03-26
Supplement: 41467_2021_22072_MOESM1_ESM.pdf [file 41467_2021_22072_MOESM1_ESM.pdf]

**Supplementary Information.**

**N-protein presents early in blood, dried blood and saliva during asymptomatic and symptomatic SARS-CoV-2 infection.**

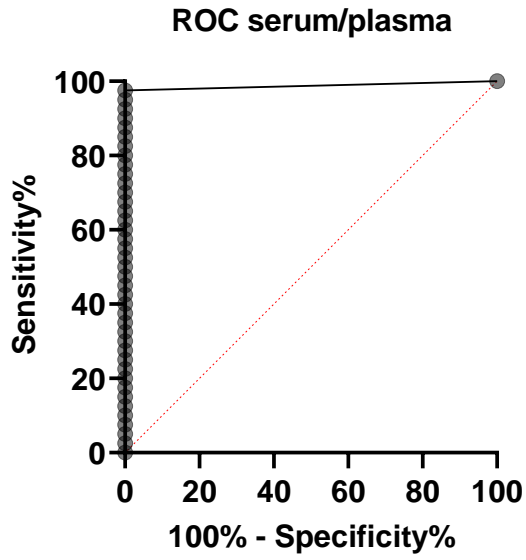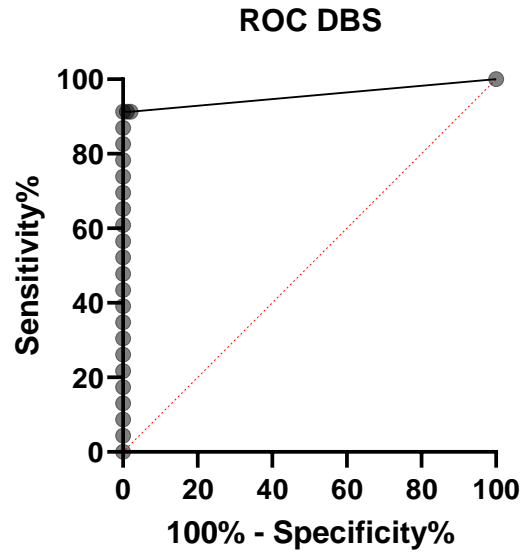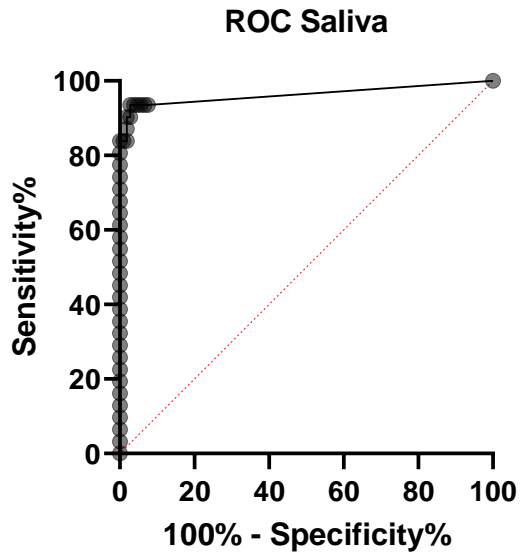

**Supplementary Figure 1** – ROC curves for serum/plasma, DBS (within 14 days of positive PCR) and saliva. See Positive / Negative Cutoff in Methods for more information.

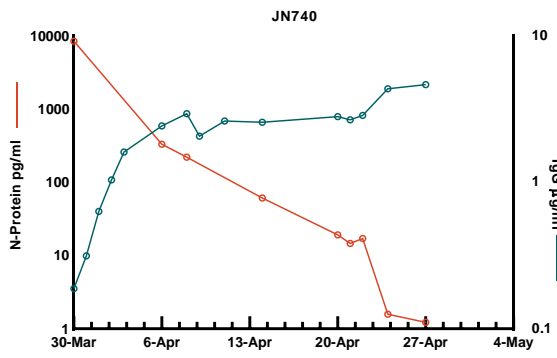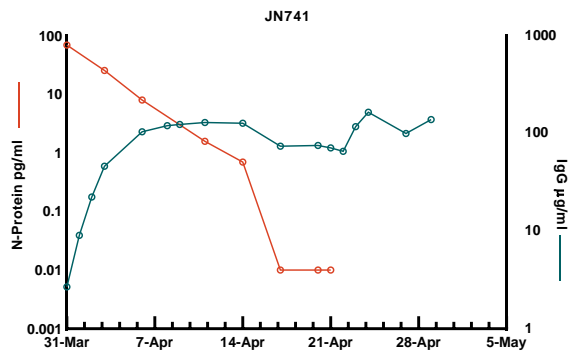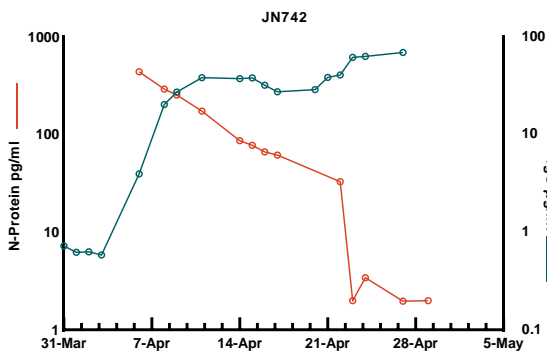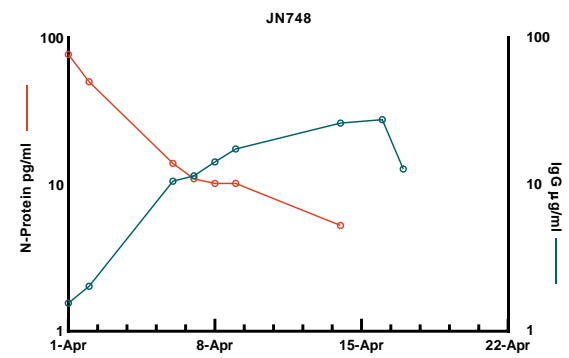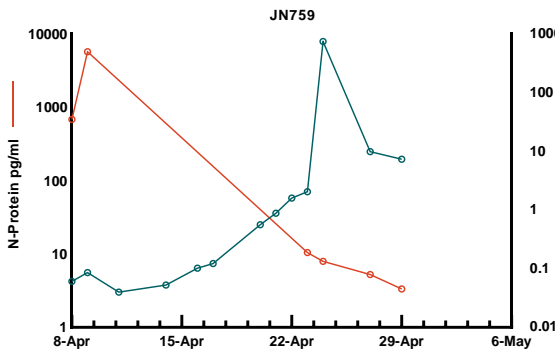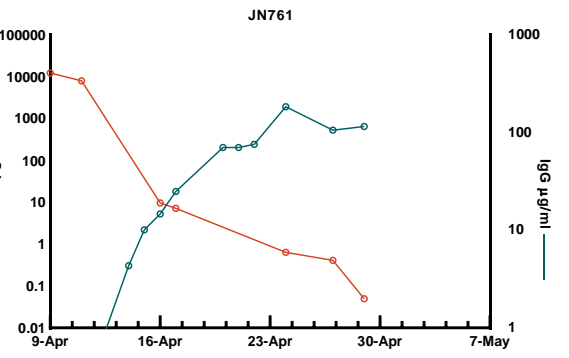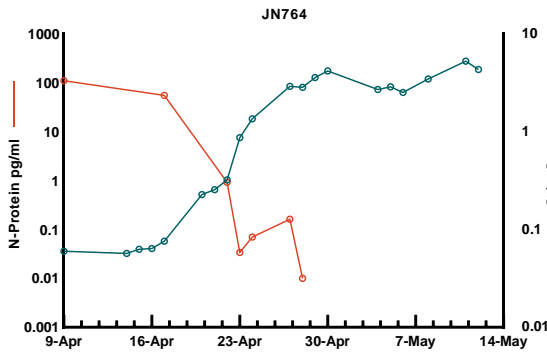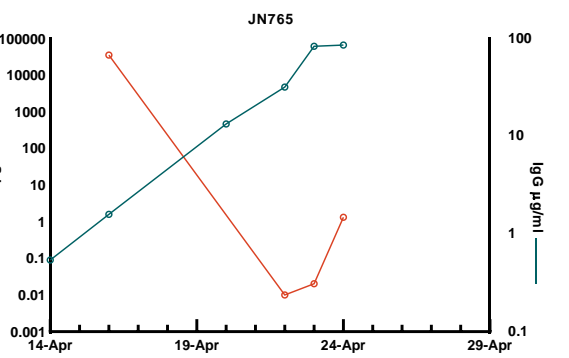

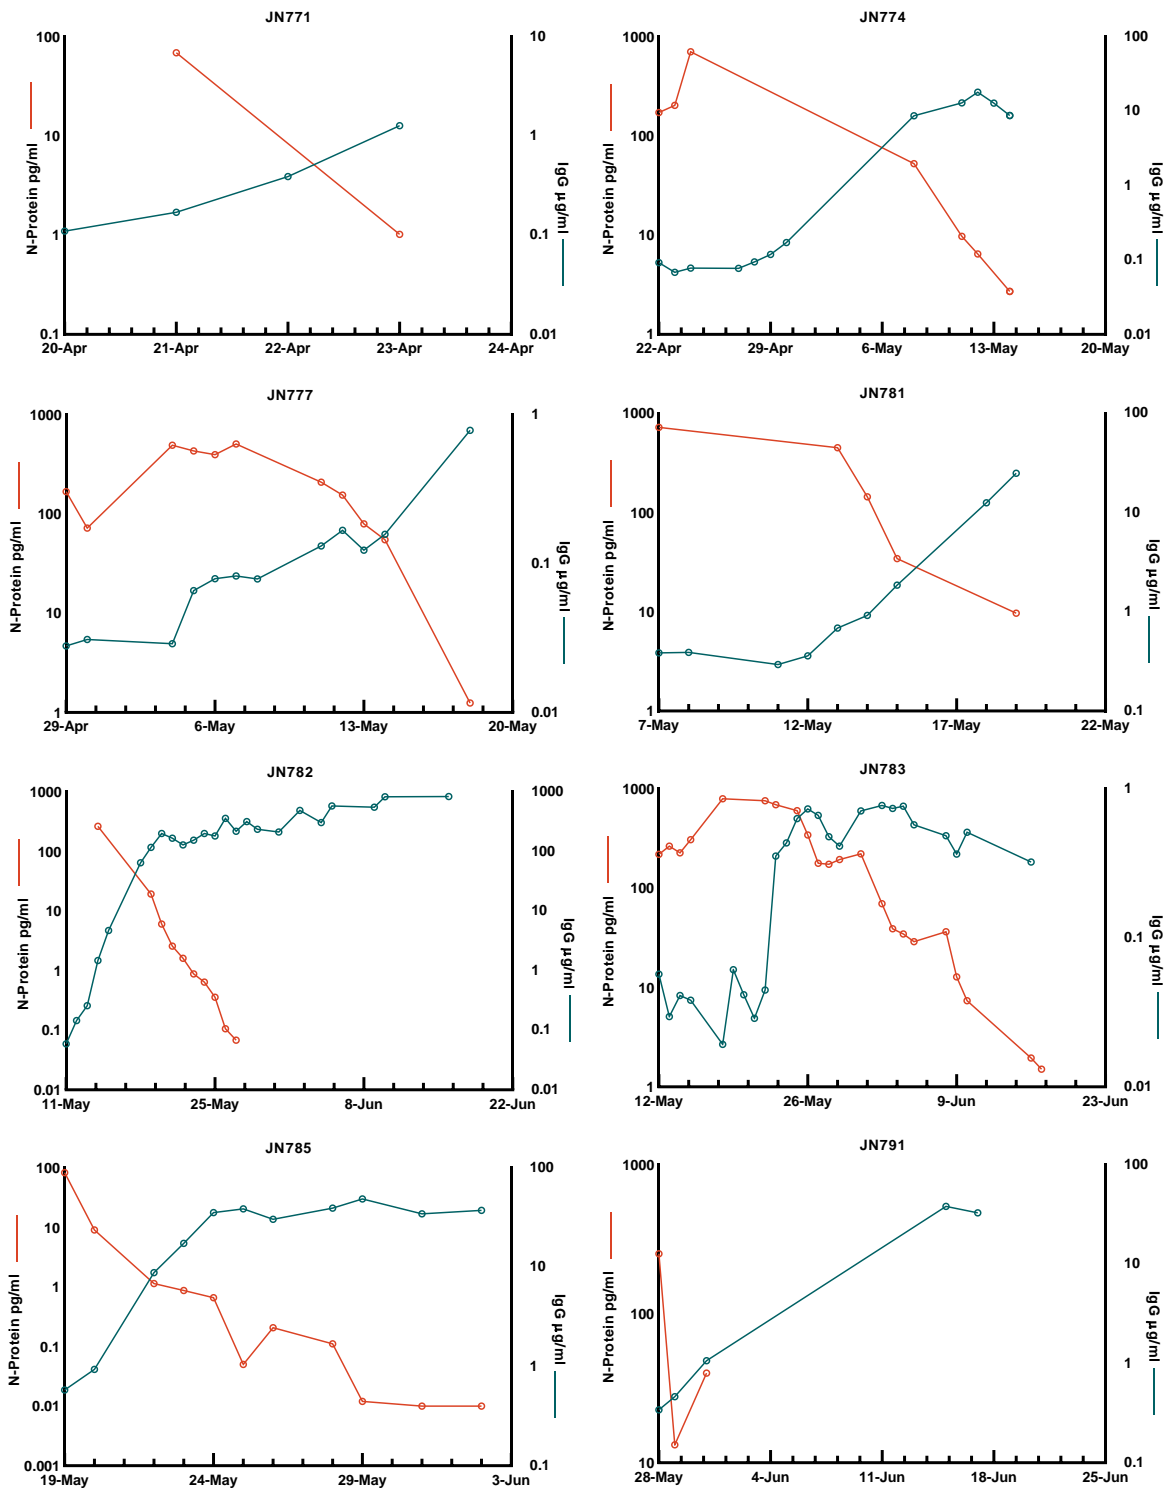

**Supplementary Figure 2** – SARS-CoV-2 N-protein and anti-spike IgG levels in plasma from the Univ of Bonn cohort. Sixteen individual donors were sampled over multiple timepoints for a total of 141 data points. N-Protein is shown in red, and IgG in blue.

## N-Protein Serum-Plasma Correlation

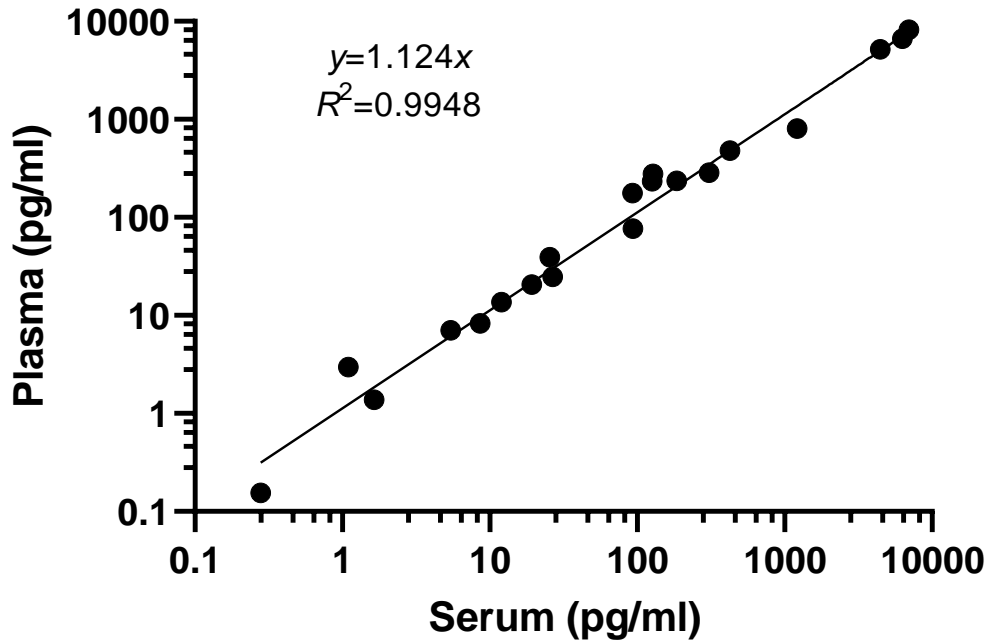

**Supplementary Figure 3.** Matched serum and plasma samples from the same donors were found to have correlation in N antigen levels between matrices. Twenty matched samples from BocaBio confirmed to be PCR+ were tested in both serum and K2 EDTA plasma.

## N-Protein DBS-Plasma Correlation

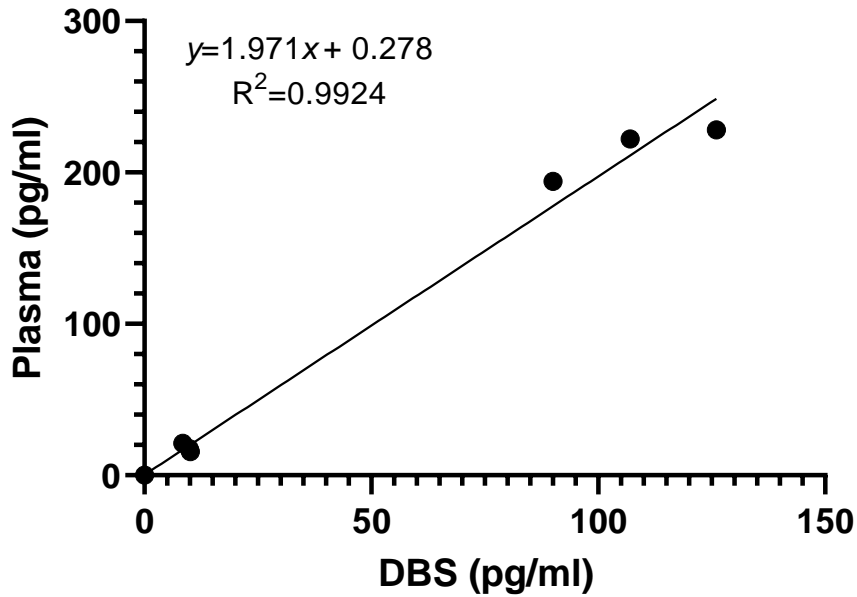

**Supplementary Figure 4.** Whole blood drawn into a K2 EDTA plasma tube (3 donors) was spiked with known levels of recombinant N-protein. It was then processed into neat plasma and in parallel into Dried Blood Microsamples (DBS) using Neoteryx Mitra tips. After extraction, both sample types were measured, showing a correlation of 0.99. The concentration in DBS was approximately  $\frac{1}{2}$  of that in plasma, as expected due to the excluded volume of hematocrit which is separated from plasma.

A.

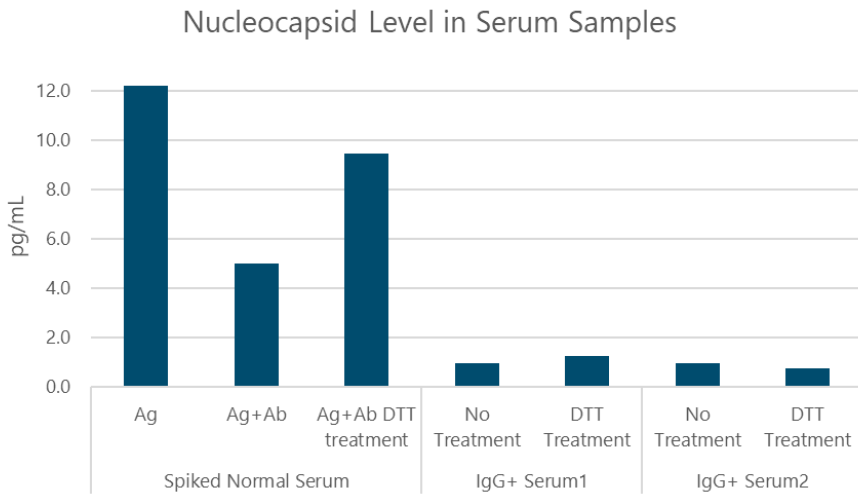

B.

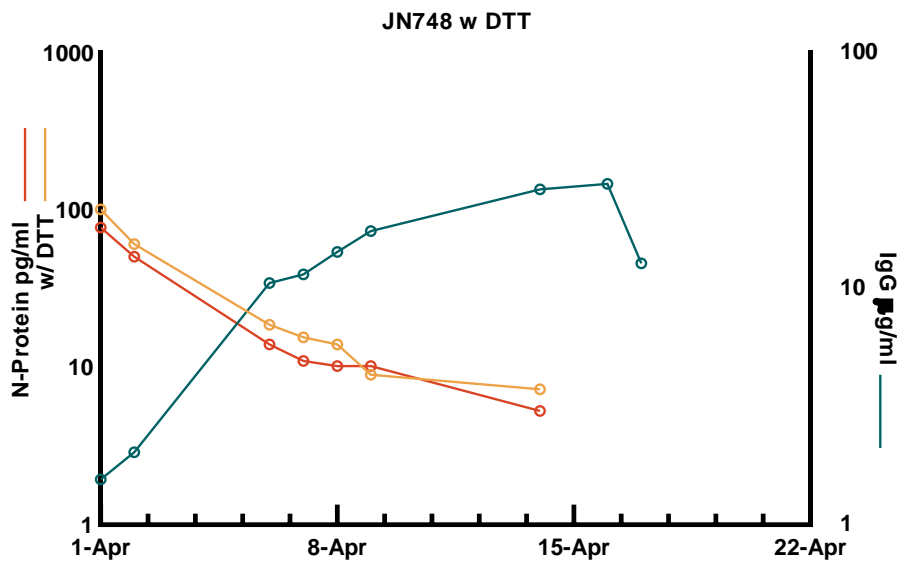

**Supplementary Figure 5. Panel A.** A DTT reduction protocol was established to unmask N-protein bound by antibody in serum by doing a control experiment with recombinant antigen and capture antibody spiked into sample matrix. N-protein concentration measured in serum was reduced after co-spiking with antibody, indicative of epitope masking. Adding DTT to the sample rescued 63% of the signal loss, indicating that this treatment could unmask antigen in seroconverted samples. **Panel B.** Longitudinal plasma samples from Donor 4 Univ of Bonn, treated with and without DTT before testing. Samples were not treated with DTT before testing for IgG. Negligible decrease in N-protein levels were observed with DTT treatment, suggesting that antibody-antigen complexes were not masking N-protein signal, or causing the observed decrease over time. N-Protein is shown in red, N-Protein from samples treated with DTT is shown in orange, and IgG is shown in blue.

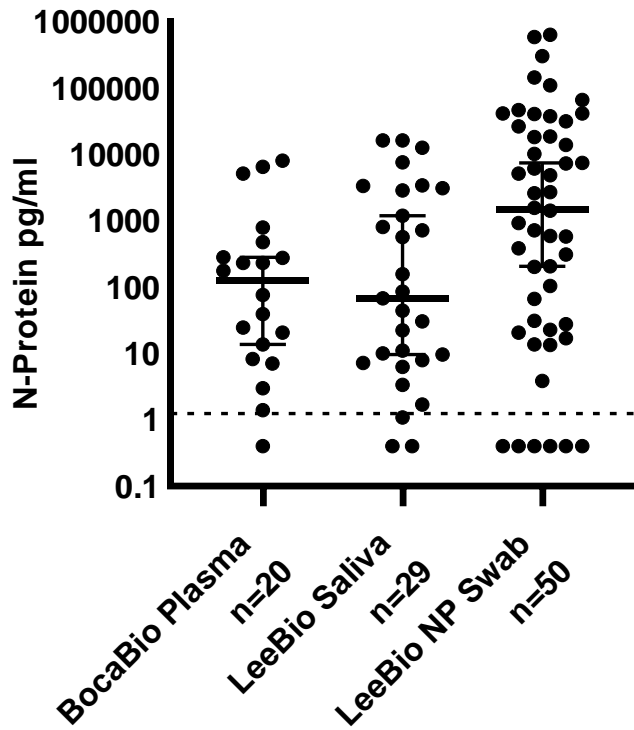

**Supplementary Figure 6.** N-protein measured in plasma, saliva and nasopharyngeal swabs from commercial sources. The solid lines represent median values (+/- 95% confidence interval).



**Table S1.** Inactivated, cultured virus was purchased from Zeptomatrix, and tested for cross-reactivity at the TCID<sub>50</sub> levels listed. No cross-reactivity was observed.

| Virus Description                                                              | Vendor      | Cat#             | Titer Tested<br>TCID <sub>50</sub> /mL | Conc Measured by N<br>antigen Assay |        |
|--------------------------------------------------------------------------------|-------------|------------------|----------------------------------------|-------------------------------------|--------|
|                                                                                |             |                  |                                        | Serum                               | Plasma |
| Adenovirus Type 07<br>(Species B) Culture Fluid                                | Zeptomatrix | 0810021CF<br>HI  | 3.52E+04                               | <LoD                                | <LoD   |
| Enterovirus Type 68 (2007<br>Isolate) Culture Fluid                            | Zeptomatrix | 0810237CF<br>HI  | 3.78E+05                               | <LoD                                | <LoD   |
| Influenza A H1N1 (New<br>Cal/20/99) Culture Fluid                              | Zeptomatrix | 0810036CF<br>HI  | 2.88E+05                               | <LoD                                | <LoD   |
| Influenza B (Florida/02/06)<br>Culture Fluid                                   | Zeptomatrix | 0810037CF<br>HI  | 3.52E+04                               | <LoD                                | <LoD   |
| Parainfluenza Virus Type 1<br>Culture Fluid                                    | Zeptomatrix | 0810014CF<br>HI  | 2.28E+06                               | <LoD                                | <LoD   |
| Parainfluenza Virus Type 2<br>Culture Fluid                                    | Zeptomatrix | 0810015CF<br>HI  | 2.88E+05                               | <LoD                                | <LoD   |
| Parainfluenza Virus Type 3<br>Culture Fluid                                    | Zeptomatrix | 0810016CF<br>HI  | 1.65E+06                               | <LoD                                | <LoD   |
| Parainfluenza Virus Type<br>4A Culture Fluid                                   | Zeptomatrix | 0810060CF<br>HI  | 7.05E+05                               | <LoD                                | <LoD   |
| Respiratory Syncytial Virus<br>Type A (Isolate: 2006<br>Isolate) Culture Fluid | Zeptomatrix | 0810040AC<br>FHI | 9.50E+05                               | <LoD                                | <LoD   |
| Rhinovirus Type 1A Culture<br>Fluid                                            | Zeptomatrix | 0810012CF<br>NHI | 8.88E+04                               | <LoD                                | <LoD   |
| Coronavirus (Strain: 229E)<br>Culture Fluid                                    | Zeptomatrix | 0810229CF<br>HI  | 1.04E+05                               | <LoD                                | <LoD   |
| Coronavirus (Strain: OC43)<br>Culture Fluid                                    | Zeptomatrix | 0810024CF<br>HI  | 2.63E+05                               | <LoD                                | <LoD   |
| Coronavirus (Strain: NL63)<br>Culture Fluid                                    | Zeptomatrix | 0810228CF<br>HI  | 4.25E+04                               | <LoD                                | <LoD   |
